# Supplementary material for: Rapid multi-dynamic algorithm for gray image analysis of the stroma percentage on colorectal cancer
Source: PubMed Central journal article supplement (PMC8210572; doi:10.7150/jca.58887), 2021-06-01
Supplement: jcav12p4561s1.pdf [file jcav12p4561s1.pdf]

**Materials Figure for**

**Rapid multi-dynamic algorithm for gray image analysis of the stroma  
percentage on colorectal cancer**

**Supplementary Figure**

A

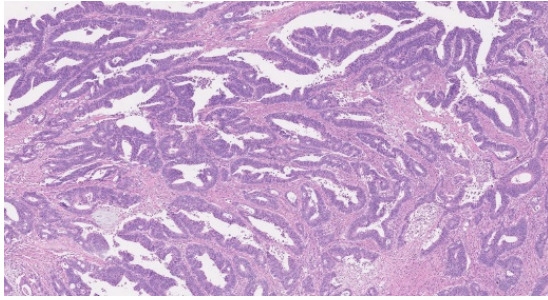

B

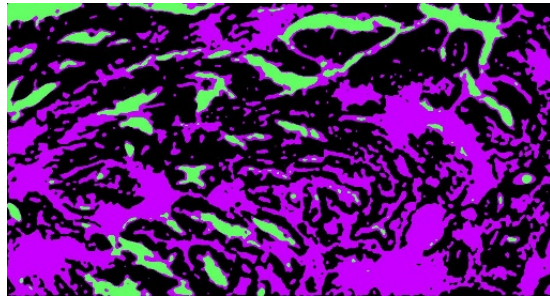

Green- Necrosis (num1)    Black -Tumor (num2)    Purple-Stroma (num3)

**Supplementary Figure 1.** The regions with tissues segmented by the MATLAB for the calculation of TSP-cad.

(A)Original Red-Green-Blue(RGB) style (B)Image was annotated using tumor, stroma and necrosis labels.

The result was num1= 0.0863    num2= 0.5459    num3=0.368

we considered the tumor and stroma proportions to be complementary.

$TSP = \text{Stroma} / (\text{Tumor} + \text{Stroma}) * 100\% = \text{num3} / (\text{num2} + \text{num3}) * 100\% = 0.368 / (0.5459 + 0.368)$

$* 100\% = 40.27\%$

**A**

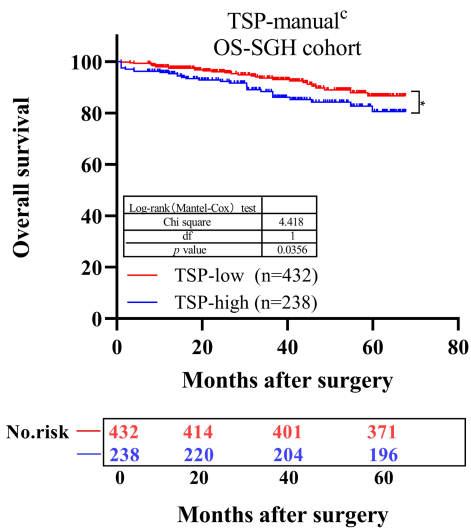

**B**

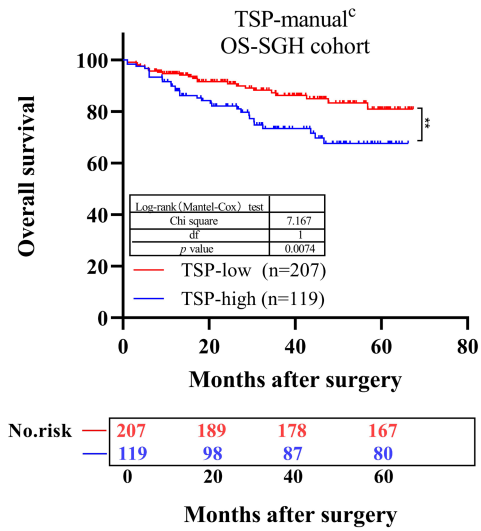

**Supplementary Figure 2.** Kaplan-Meier survival analysis curves of SGH cohort for TSP-low versus TSP-high. (A) represent the OS of the left-sided and rectum tumors (B) represent the OS of the right-sided tumors.

**A**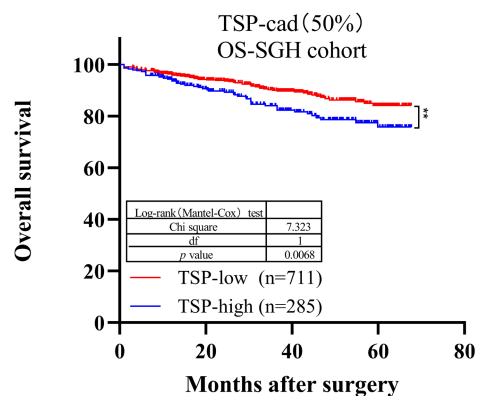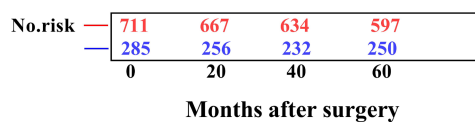**B**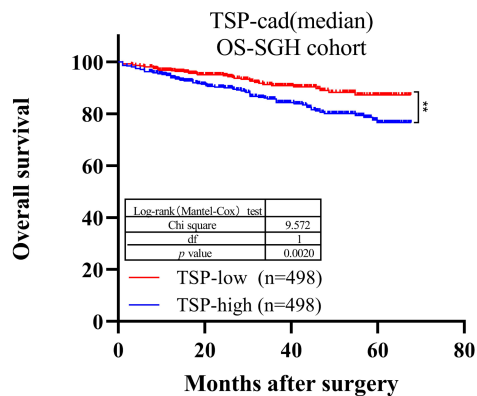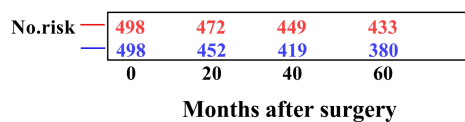**C**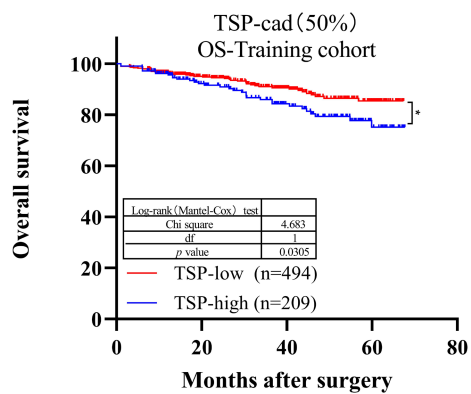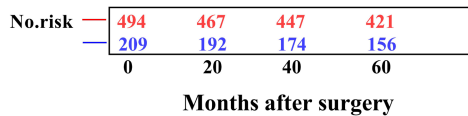**D**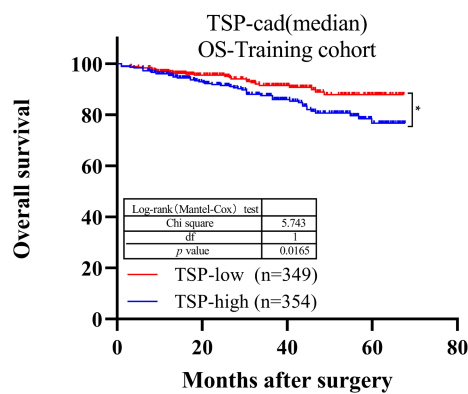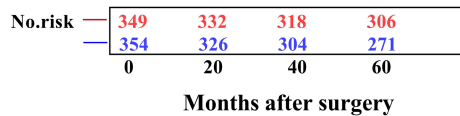**E****F**

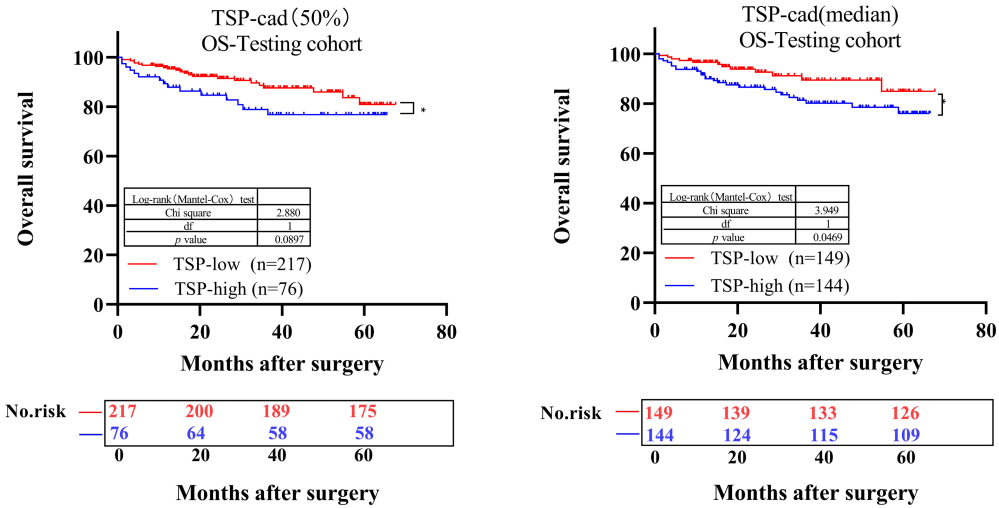

**Supplementary Figure 3.** Kaplan-Meier survival analysis for overall survival of TSP-low verse TSP-high. Results for SGH cohort (A,B), Training cohort (C,D), Testing cohort (E,F), according to the TSP-cad(50%) and TSP-cad(medium) classifier stratified by clinicopathological risk factors. *P*-values were calculated by log-rank test.

**Materials Table for**

**Rapid multi-dynamic algorithm for gray image analysis of the stroma  
percentage on colorectal cancer**

**Supplementary Table**

**Supplementary Table 1** Clinicopathological data for TMA cohort in relation to TSP-manual

| Variable              | TSP-manual <sup>a</sup> |            |             | p value  |
|-----------------------|-------------------------|------------|-------------|----------|
|                       | N                       | TSP-low(%) | TSP-high(%) |          |
| Age(years)            |                         |            |             | 0.057    |
| <65                   | 55                      | 37(59.7%)  | 18(40.9%)   |          |
| ≥65                   | 51                      | 25(40.3%)  | 26(59.1%)   |          |
| Gender                |                         |            |             | 0.947    |
| Male                  | 55                      | 32(51.6%)  | 23(52.3%)   |          |
| Female                | 51                      | 30(48.4%)  | 21(47.7%)   |          |
| TNM Stage             |                         |            |             | < 0.001* |
| I+II                  | 51                      | 41(66.1%)  | 10(22.7%)   |          |
| III+IV                | 55                      | 21(33.9%)  | 34(77.3%)   |          |
| Depth of invasion     |                         |            |             | 0.991    |
| T1+T2                 | 12                      | 7(11.3%)   | 5(11.4%)    |          |
| T3+T4                 | 94                      | 55(88.7%)  | 39(88.6%)   |          |
| Lymph node metastasis |                         |            |             | < 0.001* |
| N0                    | 49                      | 39(62.9%)  | 10(22.7%)   |          |
| N1+N2                 | 57                      | 23(37.1%)  | 34(77.3%)   |          |
| Nerve invasion        |                         |            |             | 0.720    |
| NO                    | 79                      | 47(75.8%)  | 32(73.7%)   |          |
| YES                   | 27                      | 15(24.2%)  | 12(27.3%)   |          |
| Vessel invasion       |                         |            |             | 0.061    |
| NO                    | 66                      | 34(54.8%)  | 32(72.7%)   |          |
| YES                   | 40                      | 28(45.2%)  | 12(27.3%)   |          |

|                 |    |           |           |       |
|-----------------|----|-----------|-----------|-------|
| Differentiation |    |           |           | 0.954 |
| Well            | 19 | 11(17.7%) | 8(18.2%)  |       |
| Moderate+poor   | 87 | 51(82.3%) | 36(81.8%) |       |
| Tumor size      |    |           |           | 0.323 |
| <5cm            | 59 | 37(59.7%) | 22(50.0%) |       |
| ≥5cm            | 47 | 25(40.3%) | 22(50.0%) |       |
| Tumor location  |    |           |           | 0.107 |
| Right           | 41 | 20(32.3%) | 21(47.7%) |       |
| Left and rectal | 65 | 42(67.7%) | 23(52.3%) |       |

\*P < 0.05

**Supplementary Table 2** Clinicopathological data for TCGA cohort in relation to TSP-manual

| Variable              | TSP- manual <sup>a</sup> |            |             | p value |
|-----------------------|--------------------------|------------|-------------|---------|
|                       | N                        | TSP-low(%) | TSP-high(%) |         |
| Age(years)            |                          |            |             | 0.697   |
| <65                   | 200                      | 160(46.2%) | 40(44.0%)   |         |
| ≥65                   | 237                      | 186(53.8%) | 51(56.0%)   |         |
| Gender                |                          |            |             | 0.647   |
| Male                  | 235                      | 188(54.3%) | 47(51.6%)   |         |
| Female                | 202                      | 158(45.7%) | 44(48.4%)   |         |
| TNM stage             |                          |            |             | 0.024*  |
| I+II                  | 238                      | 198(57.2%) | 40(44.0%)   |         |
| III+IV                | 199                      | 148(42.8%) | 51(56.0%)   |         |
| Depth of invasion     |                          |            |             | 0.021*  |
| T1+T2                 | 91                       | 80(23.1%)  | 11(12.1%)   |         |
| T3+T4                 | 346                      | 266(76.9%) | 80(87.9%)   |         |
| Lymph node metastasis |                          |            |             | 0.028*  |
| N0                    | 246                      | 204(59.0%) | 42(46.2%)   |         |
| N1+N2                 | 191                      | 142(41.0%) | 49(53.8%)   |         |
| lymphatic invasion    |                          |            |             | 0.237   |
| NO                    | 287                      | 232(67.1%) | 55(60.4%)   |         |
| YES                   | 150                      | 114(32.9%) | 36(39.6%)   |         |
| Vessel invasion       |                          |            |             | 0.61    |
| NO                    | 340                      | 271(78.3%) | 69(75.8%)   |         |
| YES                   | 97                       | 75(21.7%)  | 22(24.2%)   |         |



|                 |     |            |           |       |
|-----------------|-----|------------|-----------|-------|
| Tumor location  |     |            |           | 0.662 |
| Right           | 169 | 132(38.2%) | 37(40.7%) |       |
| Left and rectal | 268 | 214(61.8%) | 54(59.3%) |       |

\*P < 0.05

**Supplementary Table 3** Cross-tabulation of TSP-manual versus TSP-cad after dichotomisation in the Training cohort

|                 |          | TSP-manual |          |       |
|-----------------|----------|------------|----------|-------|
|                 |          | TSP-low    | TSP-high | total |
| TSP-cad(50%)    | TSP-low  | 444        | 50       | 494   |
| K=0.827         | TSP-high | 4          | 205      | 209   |
|                 | total    | 448        | 255      | 703   |
| TSP-cad(median) | TSP-low  | 318        | 31       | 349   |
| K=0.543         | TSP-high | 130        | 224      | 354   |
|                 | total    | 448        | 255      | 703   |

**Supplementary Table 4** Cross-tabulation of TSP-manual versus TSP-cad after dichotomisation in the Testing cohort

|                        |          | TSP-manual |          |       |
|------------------------|----------|------------|----------|-------|
|                        |          | TSP-low    | TSP-high | total |
| <u>TSP-cad(50%)</u>    | TSP-low  | 190        | 27       | 217   |
| K=0.776                | TSP-high | 1          | 75       | 76    |
|                        | total    | 191        | 102      | 293   |
| <u>TSP-cad(median)</u> | TSP-low  | 139        | 10       | 149   |
| K=0.575                | TSP-high | 52         | 92       | 144   |
|                        | total    | 191        | 102      | 293   |

**Supplementary Table 5** Predictive performance comparison among the different TSP in SGH cohort

| SGH cohort      | Linear trend $\chi^2$ score | LR test |
|-----------------|-----------------------------|---------|
| Over survival   |                             |         |
| TSP-manual      | 12.025                      | 11.601  |
| TSP-cad(50%)    | 10.953                      | 10.3    |
| TSP-cad(median) | 13.445                      | 13.673  |

LR, likelihood ratio;

**Supplementary Table 6** Uni- and multivariate Cox regression analysis for overall survival in the Training cohort

|            | Univariate analysis |             | Multivariate analysis |       |              |       |                 |       |
|------------|---------------------|-------------|-----------------------|-------|--------------|-------|-----------------|-------|
|            | HR                  | 95%CI       | TSP-manual            |       | TSP-cad(50%) |       | TSP-cad(median) |       |
|            |                     |             | HR                    | 95%CI | HR           | 95%CI | HR              | 95%CI |
| Age(years) |                     |             |                       |       |              |       |                 |       |
| <65        | 1                   |             |                       |       |              |       |                 |       |
| ≥65        | 3.508               | 1.804-5.183 |                       |       |              |       |                 |       |
| Gender     |                     |             |                       |       |              |       |                 |       |
| Male       | 1                   |             |                       |       |              |       |                 |       |
| Female     | 0.594               | 0.368-0.956 |                       |       |              |       |                 |       |

TNM Stage

|                        |       |              |       |              |       |              |       |              |
|------------------------|-------|--------------|-------|--------------|-------|--------------|-------|--------------|
| I+II                   | 1     |              | 1     |              | 1     |              | 1     |              |
| III+IV                 | 3.695 | 2.291-5.959* | 1.818 | 0.563-5.869  | 1.822 | 0.571-5.811  | 1.755 | 0.569-5.411  |
| Depth of invasion      |       |              |       |              |       |              |       |              |
| T1+T2                  | 1     |              | 1     |              | 1     |              | 1     |              |
| T3+T4                  | 2.966 | 1.364-6.452* | 1.576 | 0.697-3.564  | 1.556 | 0.687-3.524  | 1.574 | 0.696-3.561  |
| LN metastasis          |       |              |       |              |       |              |       |              |
| N0                     | 1     |              | 1     |              | 1     |              | 1     |              |
| N1+N2                  | 3.584 | 2.223-5.779* | 1.497 | 0.464-4.830  | 1.494 | 0.469-4.759  | 1.516 | 0.494-4.653  |
| Nerve invasion         |       |              |       |              |       |              |       |              |
| NO                     | 1     |              | 1     |              | 1     |              | 1     |              |
| YES                    | 2.165 | 1.359-3.450* | 1.191 | 0.713-1.992  | 1.21  | 0.724-2.021  | 1.217 | 0.729-2.031  |
| Vessel invasion        |       |              |       |              |       |              |       |              |
| NO                     | 1     |              | 1     |              | 1     |              | 1     |              |
| YES                    | 3.004 | 1.913-4.716* | 1.981 | 1.190-3.298* | 1.98  | 1.189-3.295* | 1.965 | 1.182-3.267* |
| Differentiation status |       |              |       |              |       |              |       |              |
| Well                   | 1     |              |       |              |       |              |       |              |
| Moderate+poor          | 1.511 | 0.610-3.743  |       |              |       |              |       |              |
| Tumor size             |       |              |       |              |       |              |       |              |
| <5cm                   | 1     |              |       |              |       |              |       |              |
| ≥5cm                   | 1.059 | 0.670-1.675  |       |              |       |              |       |              |
| Tumor location         |       |              |       |              |       |              |       |              |
| Right                  | 1     |              | 1     |              | 1     |              | 1     |              |
| Left and rectal        | 0.564 | 0.360-0.884* | 0.581 | 0.366-0.992* | 0.575 | 0.363-0.913* | 0.567 | 0.358-0.898* |
| TSP-manual             |       |              |       |              |       |              |       |              |
| TSP-low                | 1     |              | 1     |              |       |              |       |              |
| TSP-high               | 1.61  | 1.030-2.517* | 1.376 | 0.876-2.161* |       |              |       |              |
| TSP-cad(50%)           |       |              |       |              |       |              |       |              |
| TSP-low                | 1     |              |       |              | 1     |              |       |              |
| TSP-high               | 1.638 | 1.042-2.573* |       |              | 1.413 | 0.908-2.256* |       |              |
| TSP-cad(median)        |       |              |       |              |       |              |       |              |
| TSP-low                | 1     |              |       |              |       |              | 1     |              |
| TSP-high               | 1.759 | 1.101-2.809* |       |              |       |              | 1.539 | 0.960-2.468* |

Abbreviations: HR: hazard ratio; CI: confidence interval; LN metastasis:Lymph node metastasis

\*P < 0.05

**Supplementary Table 7** Uni- and multivariate Cox regression analysis for overall survival in the Testing cohort

|            | Univariate analysis |             | Multivariate analysis |       |              |       |                 |       |
|------------|---------------------|-------------|-----------------------|-------|--------------|-------|-----------------|-------|
|            | HR                  | 95%CI       | TSP-manual            |       | TSP-cad(50%) |       | TSP-cad(median) |       |
|            |                     |             | HR                    | 95%CI | HR           | 95%CI | HR              | 95%CI |
| Age(years) |                     |             |                       |       |              |       |                 |       |
| <65        | 1                   |             |                       |       |              |       |                 |       |
| ≥65        | 2.368               | 1.646-3.407 |                       |       |              |       |                 |       |
| Gender     |                     |             |                       |       |              |       |                 |       |
| Male       | 1                   |             |                       |       |              |       |                 |       |
| Female     | 0.613               | 0.413-0.909 |                       |       |              |       |                 |       |

|                        |       |              |       |              |       |              |       |              |  |
|------------------------|-------|--------------|-------|--------------|-------|--------------|-------|--------------|--|
| TNM Stage              |       |              |       |              |       |              |       |              |  |
| I+II                   | 1     |              | 1     |              | 1     |              | 1     |              |  |
| III+IV                 | 3.54  | 2.404-5.212* | 1.171 | 0.443-3.096  | 1.197 | 0.46-3.114   | 1.214 | 0.486-3.169  |  |
| Depth of invasion      |       |              |       |              |       |              |       |              |  |
| T1+T2                  | 1     |              | 1     |              | 1     |              | 1     |              |  |
| T3+T4                  | 2.878 | 1.504-5.506* | 1.343 | 0.681-2.65   | 1.343 | 0.68-2.651   | 1.315 | 0.666-2.597  |  |
| LN metastasis          |       |              |       |              |       |              |       |              |  |
| N0                     | 1     |              | 1     |              | 1     |              | 1     |              |  |
| N1+N2                  | 3.724 | 2.516-5.512* | 2.334 | 0.869-6.268  | 2.305 | 0.872-6.092  | 2.186 | 0.841-5.678  |  |
| Nerve invasion         |       |              |       |              |       |              |       |              |  |
| NO                     | 1     |              | 1     |              | 1     |              | 1     |              |  |
| YES                    | 2.298 | 1.575-3.353* | 1.38  | 0.96-2.103   | 1.41  | 0.927-2.145  | 1.398 | 0.919-2.126  |  |
| Vessel invasion        |       |              |       |              |       |              |       |              |  |
| NO                     | 1     |              | 1     |              | 1     |              | 1     |              |  |
| YES                    | 2.684 | 1.858-3.875* | 1.608 | 1.055-2.451* | 1.593 | 1.045-2.427* | 1.593 | 1.046-2.425* |  |
| Differentiation status |       |              |       |              |       |              |       |              |  |
| Well                   | 1     |              | 1     |              | 1     |              | 1     |              |  |
| Moderate+poor          | 2.574 | 1.050-6.312* | 2.613 | 0.874-5.352  | 2.19  | 0.884-5.423  | 2.198 | 0.888-5.443  |  |
| Tumor size             |       |              |       |              |       |              |       |              |  |
| <5cm                   | 1     |              |       |              |       |              |       |              |  |
| ≥5cm                   | 1.287 | 0.889-1.862  |       |              |       |              |       |              |  |
| Tumor location         |       |              |       |              |       |              |       |              |  |
| Right                  | 1     |              | 1     |              | 1     |              | 1     |              |  |
| Left and rectal        | 0.502 | 0.348-0.723* | 0.467 | 0.320-0.682* | 0.461 | 0.316-0.673* | 0.456 | 0.312-0.664* |  |
| TSP-manual             |       |              |       |              |       |              |       |              |  |
| TSP-low                | 1     |              | 1     |              |       |              |       |              |  |
| TSP-high               | 1.75  | 1.214-2.523* | 1.512 | 1.045-2.187* |       |              |       |              |  |
| TSP-cad(50%)           |       |              |       |              |       |              |       |              |  |
| TSP-low                | 1     |              |       |              | 1     |              |       |              |  |
| TSP-high               | 1.659 | 1.145-2.405* |       |              | 1.443 | 0.993-2.097  |       |              |  |
| TSP-cad(median)        |       |              |       |              |       |              |       |              |  |
| TSP-low                | 1     |              |       |              |       |              | 1     |              |  |
| TSP-high               | 1.823 | 1.239-2.683* |       |              |       |              | 1.632 | 1.105-2.410* |  |

Abbreviations: HR: hazard ratio; CI: confidence interval; LN metastasis:Lymph node metastasis

\*P < 0.05
